# Supplementary material for: m6A-induced lncDBET promotes the malignant progression of bladder cancer through FABP5-mediated lipid metabolism
Source: PubMed Central journal article supplement (PMC9475447; doi:10.7150/thno.71456), 2022-08-29
Supplement: thnov12p6291s1.pdf [file thnov12p6291s1.pdf]

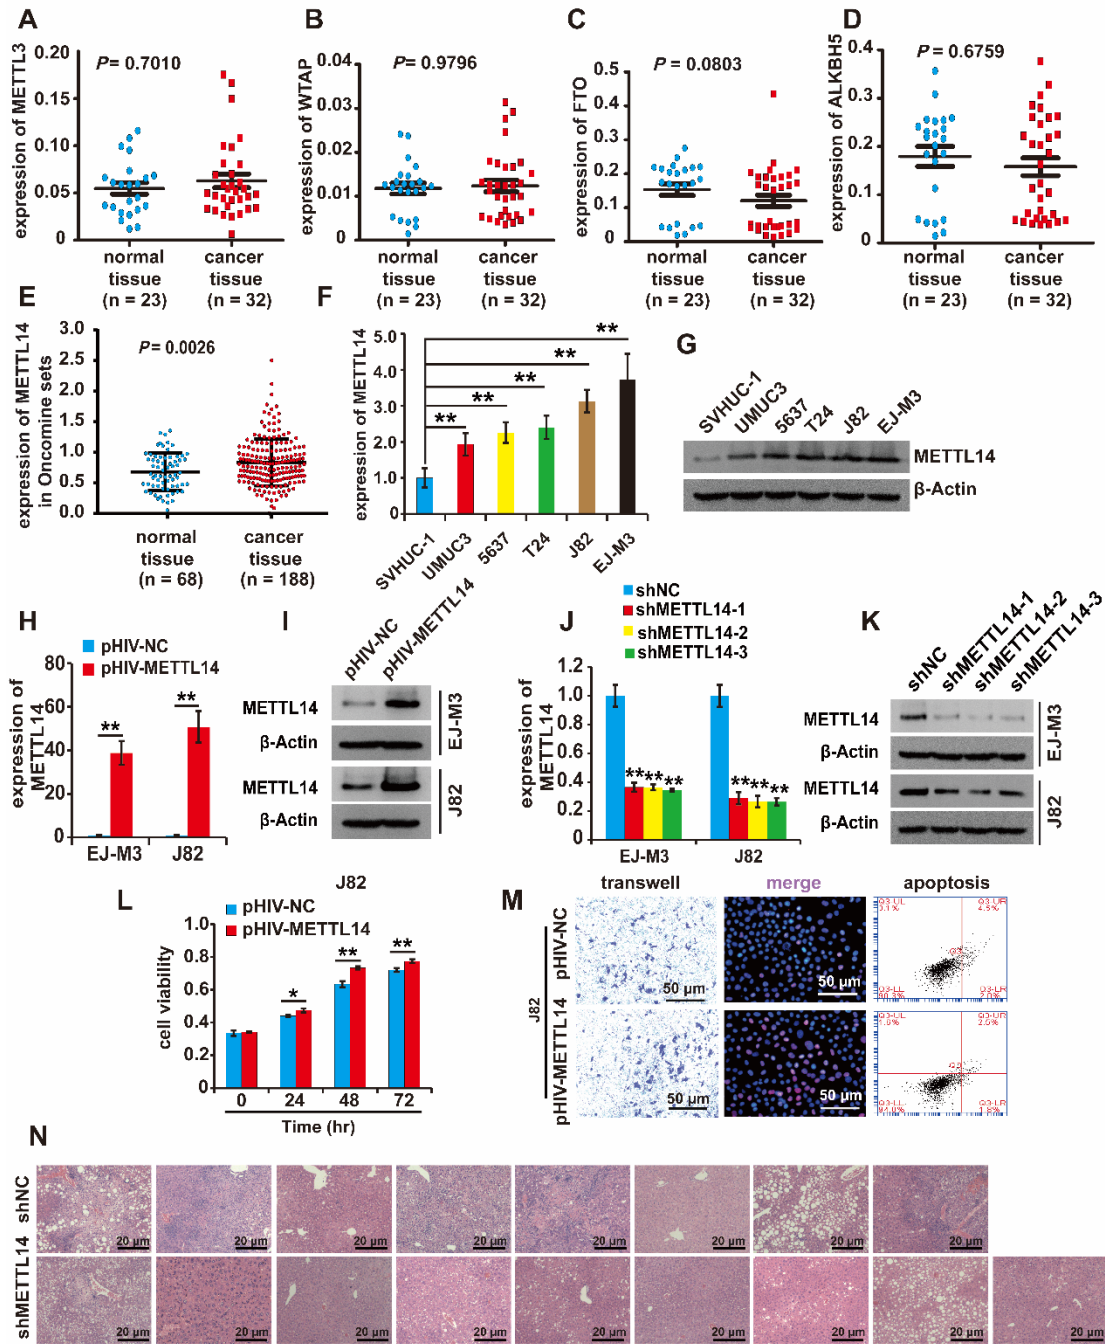

### Supplementary Figure 1

(A-D) qPCR analysis of the main m<sup>6</sup>A-associated methyltransferases and demethylases in BCa tissues (n = 32) and normal bladder tissues (n = 23).

(E) qPCR analysis of METTL14 in BCa tissues and normal bladder tissues from LEE Bladder in ONCOMINE database (Reporter: ILMN\_1673037).

(F-G) qPCR and western blotting analysis of METTL14 in the normal urothelial cell line SVHUC-1 and five BCa cell lines (UMUC3, 5637, T24, J82 and EJ-M3).

(H-I) qPCR and western blotting analysis of METTL14 in J82 and EJ-M3 cells transfected with pHIV-METTL14 or shMETTL14.

(J-K) qPCR and western blotting analysis of FABP5 in J82 and EJ-M3 cells transfected with shMETTL14.

(L) CCK8 assay for the viability of J82 cell lines respectively transfected with shMETTL14 and pHIV-METTL14 and control shRNA(shNC)/pHIV-RNA (pHIV-NC).

(M) Transwell, EdU and Flow cytometry assays for the migration, proliferation and apoptosis of

J82 cell lines respectively transfected with shMETTL14 and pHIV-METTL14 and control shRNA (shNC)/pHIV-RNA (pHIV-NC). UL, fragment and damaged cells; UR, late apoptosis and dead cells; LL, normal cells of negative control group; LR, early apoptotic cells. (N) HE staining analysis of the livers in metastasis tumor mice model injected EJ-M3 cells transfected with shMETTL14 or shNC through caudal vein. The bar was 20  $\mu$ m. Each experiment was repeated a minimum of three times. The symbol \* denotes a significant difference ( $P < 0.05$ ), while \*\* represents a highly significant difference ( $P < 0.01$ ).

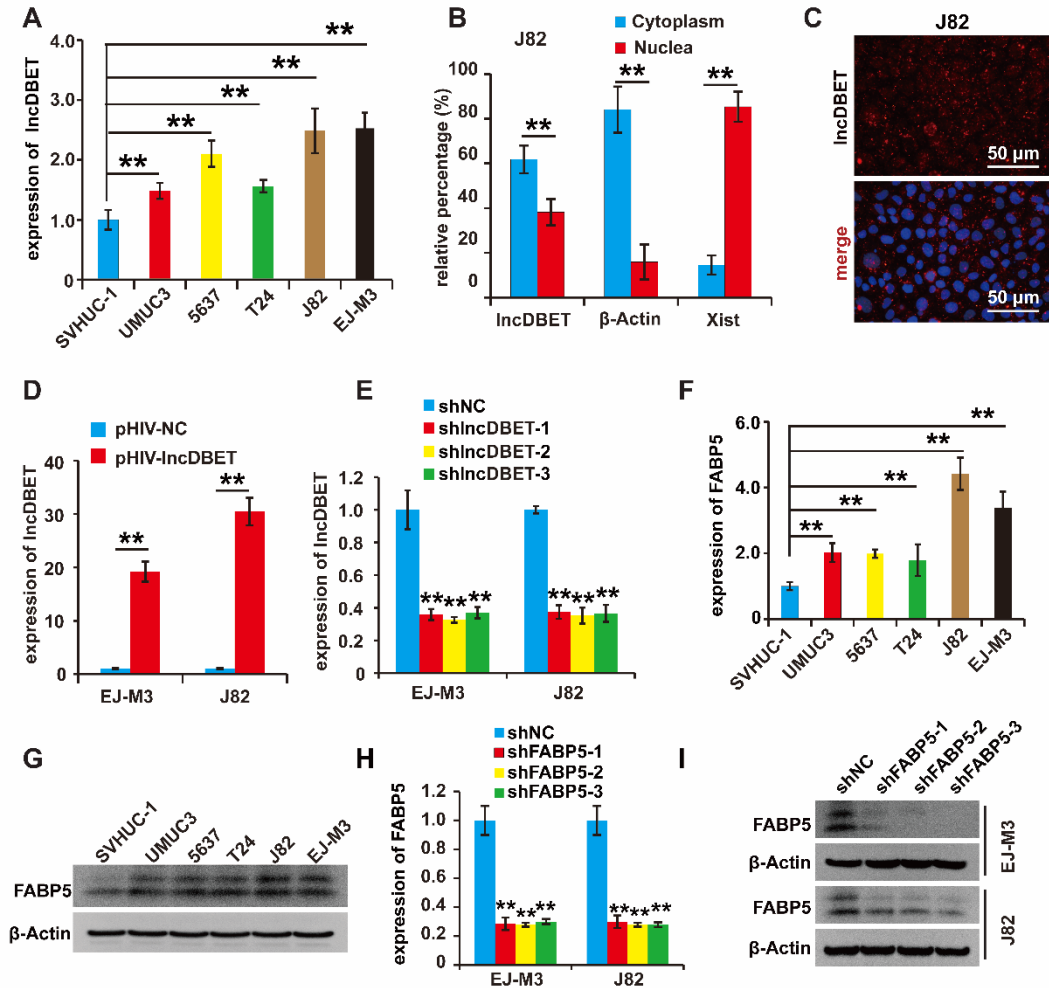

### Supplementary Figure 2

- (A) qPCR analysis of lncDBET in the normal urothelial cell line SVHUC-1 and five BCa cell lines (UMUC3, 5637, T24, J82 and EJ-M3).
- (B) Localization analysis of lncDBET by biochemical fractionation in J82 cells.  $\beta$ -Actin (mostly in the cytoplasm) and Xist (mostly in the nuclei) are as control teams.
- (C) Localization analysis of lncDBET by fluorescence in situ hybridization (FISH) in J82 cells. Cell nuclei were counterstained with Hoechst (blue). Each experiment was repeated a minimum of three times. The symbol \* denotes a significant difference ( $P < 0.05$ ), while \*\* represents a highly significant difference ( $P < 0.01$ ).
- (D-E) qPCR analysis of lncDBET in J82 and EJ-M3 cells transfected with pHIV-lncDBET or shlncDBET.
- (F) qPCR analysis of FABP5 in the normal urothelial cell line SVHUC-1 and five BCa cell lines (UMUC3, 5637, T24, J82 and EJ-M3).
- (G) Western blotting analysis of FABP5 in six paired cancer and adjacent normal tissues of BCa.  $\beta$ -Actin was used as the control.
- (H-I) qPCR and western blotting analysis of FABP5 in J82 and EJ-M3 cells transfected with shFABP5.

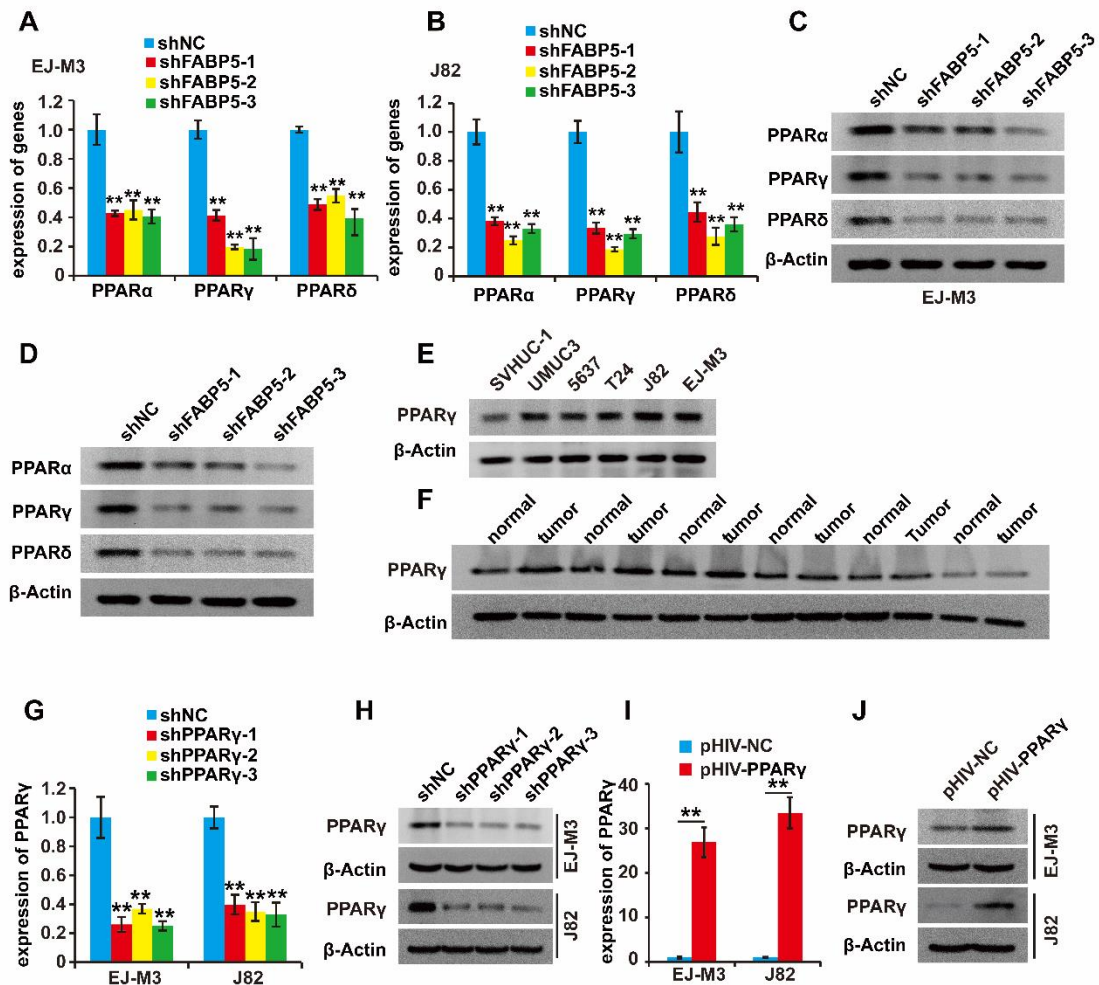

(A-D) qPCR and western blotting analysis of PPARs in J82 and EJ-M3 cells transfected with shFABP5.

(E-F) western blotting analysis of PPAR $\gamma$  in BCa tissues and normal bladder tissues; and in the normal urothelial cell line SVHUC-1 and five BCa cell lines (UMUC3, 5637, T24, J82 and EJ-M3).

(G-J) qPCR and western blotting analysis of PPAR $\gamma$  in J82 and EJ-M3 cells transfected with pHIV-PPAR $\gamma$  or shPPAR $\gamma$ .

#### Supplementary Figure 4

(A-B) CCK8, Transwell, EdU and flow cytometry assays for the viability, migration, proliferation and apoptosis of J82 cell lines transfected with shPPAR $\gamma$ +pcDH-FABP5+shlncDBET, pcDH-FABP5+shlncDBET, pcDH-NC+shlncDBET and pcDH-NC+shNC.

(C-D) CCK8, Transwell, EdU and flow cytometry assays for the viability, migration, proliferation and apoptosis of J82 cell lines transfected with pcDH

PPAR $\gamma$ +shFABP5+pcDHlncDBET+shMETTL14, shFABP5+pcDH-lncDBET+shMETTL14, pcDH-lncDBET+shMETTL14, pcDH-NC+shMETTL14 and pcDH-NC+shNC. Each experiment was repeated a minimum of three times. The symbol \* denotes a significant difference ( $P < 0.05$ ), while \*\* represents a highly significant difference ( $P < 0.01$ ).

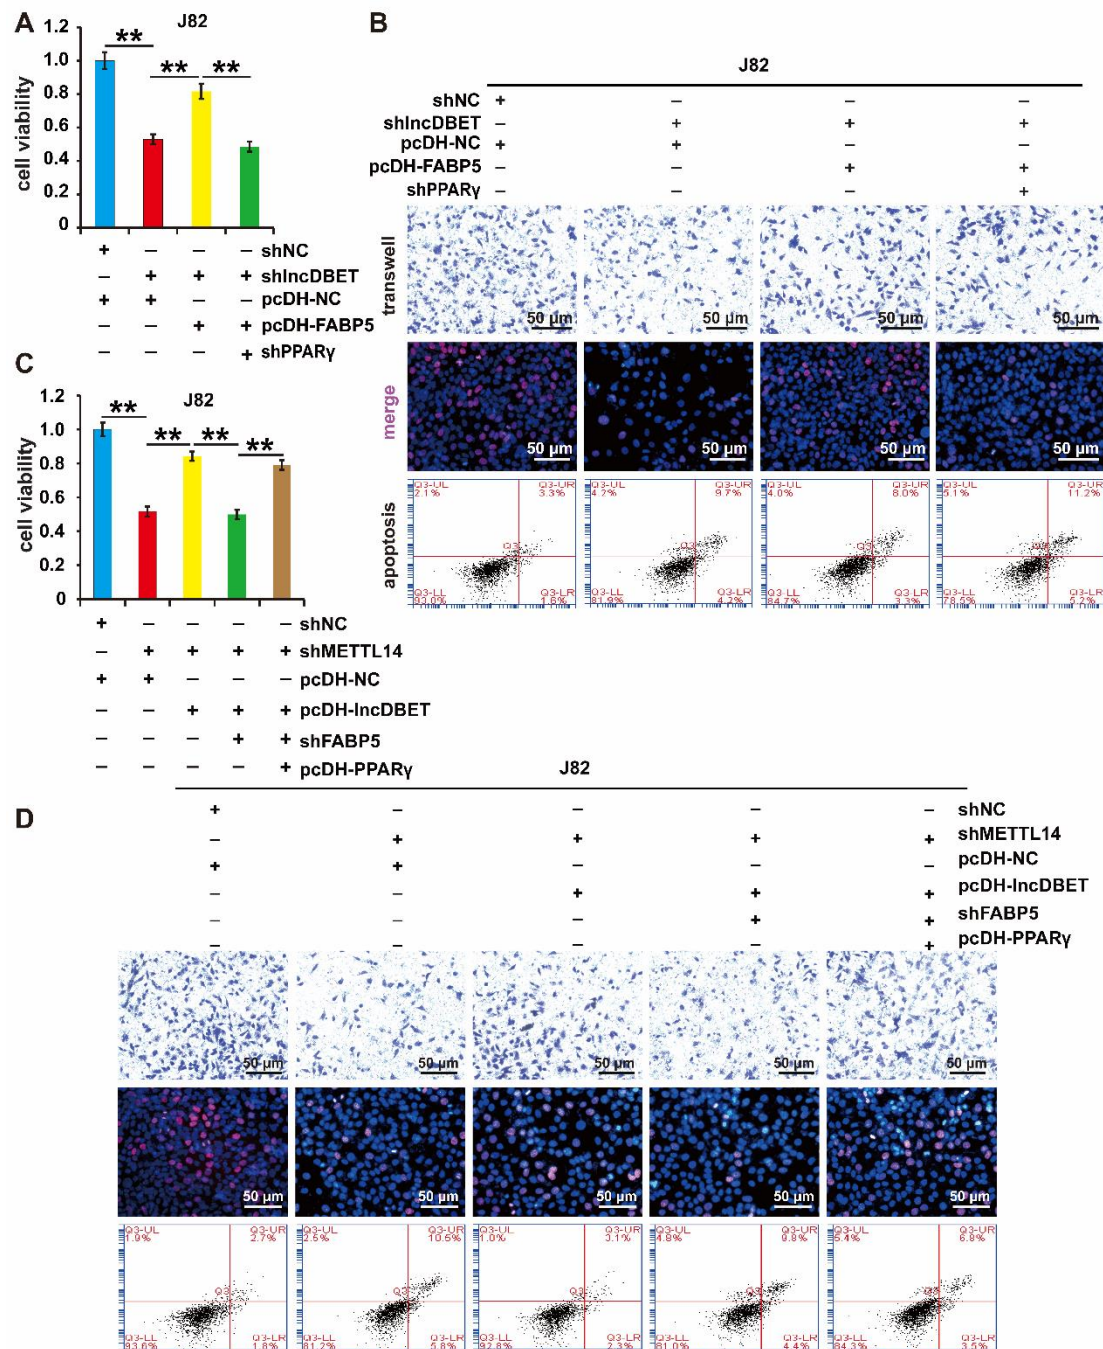

#### Supplementary Figure 4

(A-B) CCK8, Transwell, EdU and flow cytometry assays for the viability, migration, proliferation and apoptosis of J82 cell lines transfected with shPPAR $\gamma$ +pcDH-FABP5+shlncDBET, pcDH-FABP5+shlncDBET, pcDH-NC+shlncDBET and pcDH-NC+shNC.

(C-D) CCK8, Transwell, EdU and flow cytometry assays for the viability, migration, proliferation and apoptosis of J82 cell lines transfected with pcDH PPAR $\gamma$ +shFABP5+pcDHlncDBET+shMETTL14, shFABP5+pcDH-lncDBET+shMETTL14, pcDH-lncDBET+shMETTL14, pcDH-NC+shMETTL14 and pcDH-NC+shNC. Each experiment was repeated a minimum of three times. The symbol \* denotes a significant difference ( $P < 0.05$ ), while \*\* represents a highly significant difference ( $P < 0.01$ ).

**Table S1** List of downregulated m<sup>6</sup>A modification lncRNAs from BCa m<sup>6</sup>A-lncRNA epitranscriptomic microarray

| <b>Transcript_ID</b> | <b>Gene Symbol</b> | <b>Fold change<br/>(log<sub>2</sub>-Scaled)</b> | <b>P value</b> |
|----------------------|--------------------|-------------------------------------------------|----------------|
| ENST00000508732      | CTD-2536I1.1       | -2.616439873                                    | 0.000113278    |
| ENST00000561237      | TRIM69             | -0.850194954                                    | 0.037153064    |
| ENST00000534036      | RP11-2C23.1        | -1.154659005                                    | 0.001560242    |
| NR_045034            | APH1A              | -0.621146107                                    | 0.012592951    |
| ENST00000477018      | CAV2               | -0.723778742                                    | 0.00886292     |
| NR_136745            | PAK3               | -0.592850896                                    | 0.020527123    |
| ENST00000599078      | CTD-2561J22.4      | -1.30673788                                     | 0.005164194    |
| NR_146773            | PTCSC1             | -3.606802095                                    | 0.014489763    |
| ENST00000627173      | LINC00891          | -1.610547232                                    | 0.019553424    |
| ENST00000630918      | DBET               | -0.763805515                                    | 0.024079093    |
| ENST00000529416      | RP11-839D17.3      | -0.62509301                                     | 0.049543692    |
| ENST00000433997      | RP11-92C4.3        | -0.921497551                                    | 0.032014116    |

**Table S2** List of Hypo-up lncRNAs from BCa m<sup>6</sup>A-lncRNA & lncRNA expression microarray

| <b>Track_ID</b> | <b>log<sub>2</sub>FC.x</b> | <b>log<sub>2</sub>FC.y</b> | <b>P value</b> | <b>quadrant</b> |
|-----------------|----------------------------|----------------------------|----------------|-----------------|
| DBET            | 1.4636469                  | -0.7613579                 | 0.024079       | Hypo-up         |
| GS1-278J22.1    | 1.0886827                  | -1.2239234                 | 0.169692       | Hypo-up         |
| RP11-109E24.1   | 1.4728784                  | -1.0958627                 | 0.096076       | Hypo-up         |
| RP11-353N4.6    | 2.0519077                  | -0.8417021                 | 0.264051       | Hypo-up         |
| RP11-84G21.1    | 0.9415275                  | -0.5917865                 | 0.161864       | Hypo-up         |
| RP11-92C4.3     | 0.8763188                  | -0.9187676                 | 0.032014       | Hypo-up         |

m<sup>6</sup>A-lncRNA epitranscriptomic microarray and lncRNA expression microarray of BCa Hypo, down-regulated m<sup>6</sup>A modification;  
up, quantitatively over-expressed.

**Table S3** Quantitative expression of the six downregulated m<sup>6</sup>A modification lncRNAs from TCGA database

| Gene symbol | log <sub>2</sub> FC | P value  | Significance (Y/N) |
|-------------|---------------------|----------|--------------------|
| APH1A       | 0.558132            | 1.89e-04 | N                  |
| LINC00891   | -4.167203           | 1.70e-18 | Y                  |
| DBET        | 2.821098            | 3.25e-04 | Y                  |
| TRIM69      | -0.510902           | 2.23e-02 | N                  |
| CAV2        | -0.390410           | 2.47e-01 | N                  |
| PAK3        | -0.830588           | 1.18e-01 | N                  |

TCGA-BLCA transcript reads count data and clinical data were downloaded using TCGA bio-links R package, and lncRNA transcripts were screened using lncRNA data provided by Gene code website. Y, yes; N, no.

**Table S4** Predicted m<sup>6</sup>A sites of lncDBET based on *Cui Lab*

| Position | Sequence context         | Score (combined) | Decision              |
|----------|--------------------------|------------------|-----------------------|
| 1 276    | GUGAA AAAAU AAACU        | 0.56             | m <sup>6</sup> A site |
|          | GCAGU <b>GGACA</b> GGUCG |                  | (Low confidence)      |
|          | UAAGC CAGAC UUCAU        |                  |                       |
| 2 292    | CAGUG GACAG GCUGU        | 0.57             | m <sup>6</sup> A site |
|          | AAGCC <b>AGACU</b> UCAUC |                  | (Moderate confidence) |
|          | AAAUU UCUGC ACCAA        |                  |                       |
| 3 366    | AAAAC CCUAU UAAAC        | 0.61             | m <sup>6</sup> A site |
|          | GUCAC <b>GGACA</b> AGGCC |                  | (High confidence)     |
|          | AGAGU UUGAA UAUAC        |                  |                       |
| 4 1577   | UCUAG GUCCA GGCCG        | 0.54             | m <sup>6</sup> A site |
|          | GUGAG <b>AGACU</b> CCACA |                  | (Low confidence)      |
|          | CCGCG GAGAA CUGCC        |                  |                       |
| 5 1594   | GAGAG ACUCC ACACC        | 0.56             | m <sup>6</sup> A site |
|          | GCGGA <b>GAACU</b> GCCAU |                  | (Moderate confidence) |
|          | UCUUU CCUGG GCAUC        |                  |                       |

**Table S5** Analysis of candidate proteins binding to lncDBET based on ChIRP/MS

| <b>Gene names</b> | <b>Score</b> | <b>log<sub>2</sub>FC</b> |
|-------------------|--------------|--------------------------|
| HRNR              | 61.803       | 3.03212275               |
| POF1B             | 28.942       | 2.06735177               |
| ALOX12B           | 24.596       | 1.76272076               |
| FABP5             | 21.34        | 1.37605871               |
| FLG               | 17.028       | 1.37605871               |
| SBSN              | 13.415       | 1.37605871               |
| PRDX2             | 12.374       | 1.37605871               |
| HAL               | 10.89        | 1.37605871               |

**Table S6** The sequences of shRNAs

| Gene          | Sequences                                                                                      |
|---------------|------------------------------------------------------------------------------------------------|
| h-METTL14-1   | 5'-<br>sense (5'-3') CCGGGGAACTCCCAACAGGATTTCCCTCGAGGGAAAT<br>CCTGTTGGGAGTTCCTTTTTG-3'         |
|               | 5'-<br>antisense (5'-<br>3') AATTCAAAAAGGAACTCCCAACAGGATTTCCCTCGAG<br>GGAAATCCTGTTGGGAGTTCC-3' |
| h-shMETTL14-2 | 5'-<br>sense (5'-3') CCGGGGATTTCTGTGGTGGAAAGGCTCGAGCCTTTC<br>CACCACAGGAAATCCTTTTTG-3'          |
|               | 5'-<br>antisense (5'-<br>3') AATTCAAAAAGGATTTCTGTGGTGGAAAGGCTCGAG<br>CCTTCCACCACAGGAAATCC-3'   |
| h-shMETTL14-3 | 5'-<br>sense (5'-3') CCGGGTGGTGGAAAGGAAGCTTGTCTCGAGAACAA<br>GCTTCCTTCCACCACTTTTTG-3'           |
|               | 5'-<br>antisense (5'-<br>3') AATTCAAAAAGTGGTGGAAAGGAAGCTTGTCTCGA<br>GAACAAGCTTCCTTCCACCAC-3'   |
| h-shDBET-1    | 5'-<br>sense (5'-3') CCGGGCTGTCTGTGGTATTGCAGTTCTCGAGAACTGC<br>AATACCACAGACAGCTTTTTG-3'         |
|               | 5'-<br>antisense (5'-<br>3') AATTCAAAAAGCTGTCTGTGGTATTGCAGTTCTCGAG<br>AACTGCAATACCACAGACAGC3'  |
| h-shDBET-2    | 5'-<br>sense (5'-3') CCGGGCAGTTTCACTAGTGCTGTAGCTCGAGCTACAG<br>CACTAGTGAAACTGCTTTTTG-3'         |
|               | 5'-<br>antisense (5'-<br>3') AATTCAAAAAGCAGTTTCACTAGTGCTGTAGCTCGAG<br>CTACAGCACTAGTGAAACTGC-3' |
| h-shDBET-3    | 5'-<br>sense (5'-3') CCGGGCACTCCACATCAGGAGAGAACTCGAGTTCTCT<br>CCTGATGTGGAGTGCTTTTTG-3'         |
|               | 5'-<br>antisense (5'-<br>3') AATTCAAAAAGCACTCCACATCAGGAGAGAACTCGA<br>GTTCTCTCCTGATGTGGAGTGC-3' |
| h-shFABP5-1   | 5'-<br>sense (5'-3') CCGGGCATGACTCTGAGGAGTTATACTCGAGTATAAC<br>TCCTCAGAGTCATGCTTTTTG-3'         |



---



---

|                      |                   |                                                                           |
|----------------------|-------------------|---------------------------------------------------------------------------|
|                      | antisense (5'-3') | 5'-<br>AATTCAAAAAGCATGACTCTGAGGAGTTATACTCGAG<br>TATAACTCCTCAGAGTCATGC-3'  |
|                      | sense (5'-3')     | 5'-<br>CCGGGCTTCTCATCACTGAGTAAATCTCGAGATTTAC<br>TCAGTGATGAGAAGCTTTTTTG-3' |
| h-shFABP5-2          | antisense (5'-3') | 5'-<br>AATTCAAAAAGCTTCTCATCACTGAGTAAATCTCGAG<br>ATTTACTCAGTGATGAGAAGC-3'  |
|                      | sense (5'-3')     | 5'-<br>CCGGGCAGTATTCTCCCTCTCAATTCTCGAGAATTGA<br>GAGGGAGAATACTGCTTTTTTG-3' |
| h-shFABP5-3          | antisense (5'-3') | 5'-<br>AATTCAAAAAGCAGTATTCTCCCTCTCAATTCTCGAG<br>AATTGAGAGGGAGAATACTGC-3'  |
|                      | sense (5'-3')     | 5'-<br>CCGGGCCCGGCTCGGCCCGACCCGGCTCGAGCCGGGT<br>CGGGCCGAGCCGGGCTTTTTTG-3' |
| h-shPPAR $\gamma$ -1 | antisense (5'-3') | 5'-<br>AATTCAAAAAGCCCGGCTCGGCCCGACCCGGCTCGA<br>GCCGGGTCGGGCCGAGCCGGGC-3'  |
|                      | sense (5'-3')     | 5'-<br>CCGGGCTCGGCCCGACCCGGCTCCGCTCGAGCGGAGC<br>CGGGTCGGGCCGAGCTTTTTTG-3' |
| h-shPPAR $\gamma$ -2 | antisense (5'-3') | 5'-<br>AATTCAAAAAGCTCGGCCCGACCCGGCTCCGCTCGAG<br>CGGAGCCGGGTCGGGCCGAGC-3'  |
|                      | sense (5'-3')     | 5'-CCGGGGGTCGGCCTCGAGGACACCGCTCGAG<br>CGGTGTCCTCGAGGCCGACCTTTTTTG-3'      |
| h-shPPAR $\gamma$ -3 | antisense (5'-3') | 5'-<br>AATTCAAAAAGGGTCGGCCTCGAGGACACCGCTCGA<br>GCGGTGTCCTCGAGGCCGACCC-3'  |

---

**Table S7 Primers used in this study**

| <b>Gene</b>       | <b>primer</b> | <b>Sequence</b>                 |
|-------------------|---------------|---------------------------------|
| h-METTL3          | Forward       | 5'- TTTTCCGGTTAGCCTTCGGG -3'    |
|                   | Reverse       | 5'- GATAGAGCTCCACGTGTCCG-3'     |
| h-METTL14         | Forward       | 5'- ACCTGGAAGAGTGTGTTTACGA -3'  |
|                   | Reverse       | 5'- TGTGAGCCAGCCTTTGTTCT-3'     |
| h-WTAP            | Forward       | 5'- AAATCAACTCAGTGC GGGGT-3'    |
|                   | Reverse       | 5'- CGGGAACCCACAGTTCGATT-3'     |
| h-FTO             | Forward       | 5'- GTCTCCCAGGTTGATAAGGCA-3'    |
|                   | Reverse       | 5'- GTTCGGGCAATTCGTGACTG-3'     |
| h-ALKBH5          | Forward       | 5'- AGTTCAGTCTTCTGCTCGCC-3'     |
|                   | Reverse       | 5'- AGGAACTGTGGACATGGCAG -3'    |
| h-lncDBET         | Forward       | 5'- AAAGACCGGGACTCGGGTT -3'     |
|                   | Reverse       | 5'- CCACGCGGAAACCAAAATCA -3'    |
| h-FABP5           | Forward       | 5'- TGGCCAAGCCAGATTGTATCA-3'    |
|                   | Reverse       | 5'- CTGATGCTGAACCAATGCACC-3'    |
| h-PPAR $\alpha$   | Forward       | 5'- AAGCTGTCACCACAGTAGCTTG -3'  |
|                   | Reverse       | 5'- AACGAATCGCGTTGTGTGAC -3'    |
| h-PPAR $\delta$   | Forward       | 5'- TGACAGTGTGGGGAAGTGTC -3'    |
|                   | Reverse       | 5'- GATCCTGCATGCTCAGTCAGT -3'   |
| h-PPAR $\gamma$   | Forward       | 5'- AGAAAACCAAGGGACCCGAA -3'    |
|                   | Reverse       | 5'- AGAGAGGGTCCCATTTCGA -3'     |
| h- $\beta$ -actin | Forward       | 5'- CATTCCAAATATGAGATGCGTTGT-3' |
|                   | Reverse       | 5'- TGTGGACTTGGGAGAGGACT-3'     |
